# Supplementary material
Source: MDPI journal article supplement (https://www.mdpi.com/2076-3417/12/6/3039)
Supplement: s1 [file s1]

# Physical and Microbiological Characteristics and Antioxidant Activity of Honey Bee Pollen

Evita Straumite <sup>1,\*</sup>, Madara Bartule <sup>1</sup>, Anda Valdovska <sup>2,3</sup>, Zanda Kruma <sup>1</sup>, and Ruta Galoburda <sup>1</sup>

**Table S1.** Colour of bee pollen samples.

| Bee pollen sample |     | Colour components |               |                |
|-------------------|-----|-------------------|---------------|----------------|
|                   |     | L*                | a*            | b*             |
| Monofloral        | AR  | 73.57 ± 1.24b     | -1.00 ± 0.27d | 19.57 ± 1.85g  |
|                   | CL  | 59.67 ± 1.46f     | 5.85 ± 0.69b  | 34.09 ± 1.42e  |
|                   | DA  | 60.05 ± 1.61f     | 14.00 ± 1.03a | 61.18 ± 2.74a  |
|                   | FB  | 66.50 ± 0.93e     | -2.90 ± 0.49d | 17.88 ± 01.16g |
|                   | PHA | 45.57 ± 1.61g     | 2.34 ± 0.89c  | -1.55 ± 0.44h  |
|                   | RF  | 73.12 ± 1.61b     | 2.00 ± 0.69c  | 26.74 ± 2.10f  |
|                   | RS  | 77.52 ± 1.25a     | -4.30 ± 1.17e | 53.56 ± 1.83b  |
|                   | WI  | 70.46 ± 0.25c     | -1.45 ± 0.55d | 49.61 ± 0.70c  |
| Multifloral       | MF1 | 78.42 ± 0.94a     | -4.92 ± 0.28e | 48.51 ± 1.60c  |
|                   | MF2 | 68.75 ± 0.60d     | 1.90 ± 0.78c  | 46.93 ± 2.25c  |
|                   | MF3 | 66.03 ± 1.25e     | 2.27 ± 0.80c  | 51.35 ± 1.83bc |
|                   | MF4 | 71.40 ± 0.94bc    | -1.78 ± 0.91d | 48.06 ± 2.16c  |
|                   | MF5 | 65.31 ± 1.08e     | -1.89 ± 0.89d | 43.12 ± 2.15d  |

Monofloral pollen origin plants: AR – autumn raspberry, CL – clover, DA – dandelion, FB – fava beans, PHA – phacelia, RF – rye flower, RS – rapeseed, WI – willow; Multifloral pollen: MF1 – Broceni; MF2 – Bene; MF 3– Tervete; MF 4– Saldus; MF5 – Kuldiga.

**Table S2.** Diversity of microorganisms isolated from bee pollen samples.

| Isolated<br>microorganisms          | Samples |    |    |    |     |    |    |    |     |     |     |     |     | Total |
|-------------------------------------|---------|----|----|----|-----|----|----|----|-----|-----|-----|-----|-----|-------|
|                                     | AR      | CL | DA | FB | PHA | RF | RS | WI | MF1 | MF2 | MF3 | MF4 | MF5 |       |
| <i>Bacillus altitudinis/pumilus</i> |         |    | x  |    | x   | x  | x  |    | x   | x   | x   |     |     | 7     |
| <i>Bacillus cereus</i>              |         | x  |    |    | x   |    |    |    |     |     | x   | x   |     | 4     |
| <i>Bacillus megaterium</i>          |         |    |    |    |     |    |    |    |     |     |     | x   |     | 1     |
| <i>Bacillus oleronius</i>           |         | x  |    |    |     |    |    |    |     |     | x   |     |     | 2     |
| <i>Enterococcus faecalis</i>        |         |    |    |    |     |    |    |    |     |     |     | x   |     | 1     |
| <i>Lysinibacillus fusiformis</i>    | x       | x  |    |    |     |    |    |    |     | x   | x   |     | x   | 5     |
| <i>Micrococcus luteus</i>           |         |    |    |    |     |    | x  | x  |     |     |     |     |     | 2     |
| <i>Pantoea agglomerans</i>          |         |    |    | x  |     |    |    |    |     |     |     |     |     | 1     |
| <i>Solibacillus silvestris</i>      |         |    |    |    |     | x  |    |    |     |     |     |     |     | 1     |
| <i>Staphylococcus capitis</i>       |         |    |    |    | x   |    |    |    |     |     |     |     |     | 1     |
| <i>Staphylococcus cohnii</i>        |         |    | x  |    |     | x  |    |    |     |     |     |     |     | 2     |
| <i>ssp. cohnii</i>                  |         |    |    |    |     |    |    |    |     |     |     |     |     |       |
| <i>Staphylococcus epidermidis</i>   | x       | x  |    |    |     |    |    |    | x   |     |     |     | x   | 4     |
| <i>Staphylococcus pasteurii</i>     |         |    |    | x  |     |    |    |    |     |     |     |     |     | 1     |
| <i>Staphylococcus warneri</i>       |         |    |    |    |     | x  |    | x  |     |     |     |     |     | 2     |
| Total                               | 2       | 4  | 2  | 2  | 3   | 4  | 2  | 2  | 2   | 2   | 4   | 3   | 2   |       |

Monofloral pollen origin plants: AR – autumn raspberry, CL – clover, DA – dandelion, FB – fava beans, PHA – phacelia, RF – rye flower, RS – rapeseed, WI – willow; Multifloral pollen: MF1 – Broceni; MF2 – Bene; MF3– Tervete; MF 4– Saldus; MF5 – Kuldiga.

**Table S3.** Antimicrobial resistance detected in pollen samples.

| Samples     | Antibiotic                                                            |                              |                              |    |                                                                       |                                   | Total cases |
|-------------|-----------------------------------------------------------------------|------------------------------|------------------------------|----|-----------------------------------------------------------------------|-----------------------------------|-------------|
|             | AMP                                                                   | CN                           | CIP                          | Te | P                                                                     | SXT                               |             |
| AR          | <i>Staphylococcus epidermidis</i>                                     |                              |                              |    | <i>Staphylococcus epidermidis</i>                                     |                                   | 2           |
| CL          |                                                                       |                              |                              |    |                                                                       |                                   | 0           |
| DA          |                                                                       |                              |                              |    |                                                                       |                                   | 0           |
| FB          | <i>Staphylococcus pasteurii</i>                                       |                              |                              |    | <i>Pantoea agglomerans</i><br><i>Staphylococcus pasteurii</i>         |                                   | 3           |
| PHA         | <i>Staphylococcus capitis</i>                                         |                              |                              |    | <i>Staphylococcus capitis</i>                                         |                                   | 2           |
| RF          | <i>Staphylococcus warneri</i>                                         |                              |                              |    | <i>Staphylococcus warneri</i>                                         |                                   | 2           |
| RS          |                                                                       |                              |                              |    |                                                                       |                                   | 0           |
| WI          | <i>Staphylococcus warneri</i>                                         |                              |                              |    | <i>Staphylococcus warneri</i>                                         |                                   | 2           |
| MF1         |                                                                       |                              |                              |    |                                                                       |                                   | 0           |
| MF2         |                                                                       |                              |                              |    |                                                                       |                                   | 0           |
| MF3         |                                                                       |                              |                              |    |                                                                       |                                   | 0           |
| MF4         |                                                                       | <i>Enterococcus faecalis</i> | <i>Enterococcus faecalis</i> |    |                                                                       |                                   | 2           |
| MF5         | <i>Lysinibacillus fusiformis</i><br><i>Staphylococcus epidermidis</i> |                              |                              |    | <i>Lysinibacillus fusiformis</i><br><i>Staphylococcus epidermidis</i> | <i>Staphylococcus epidermidis</i> | 5           |
| Total cases | 7                                                                     | 1                            | 1                            | 0  | 7                                                                     | 2                                 | 18          |

Monofloral pollen origin plants: AR – autumn raspberry, CL – clover, DA – dandelion, FB – fava beans, PHA – phacelia, RF – rye flower, RS – rapeseed, WI – willow; Multifloral pollen: MF1 – Broceni; MF2 – Bene; MF 3– Tervete; MF 4– Saldus; MF5 – Kuldiga. AMP – ampicillin, CN – gentamicin, CIP – ciprofloxacin, Te – tetracycline, P – penicillin G, SXT – trimethoprim/ sulfamethoxazole.
